# Supplementary material
Source: PubMed Central journal article supplement (PMC4681536)

## Supplementary Figure Legends

**Supplementary Figure 1.** APP N-terminal, but not C-terminal fragments or full-length APP, localize to filamentous structures that stain for Rtn4, a marker of the tubular ER. **(a)** Dual labeling of CAD cells with antibodies to epitopes in the N- and C-terminal region of APP ( $APP_N$  and  $APP_C$ ). Note that the distributions of  $APP_N$  and  $APP_C$  are largely distinct throughout the cell. Also note that  $APP_N$  shows a filamentary, while  $APP_C$  a discrete, punctate, distribution, both in the soma and neurites. In CAD cells with flat soma (lower images),  $APP_N$  shows a filamentary distribution, while  $APP_C$  concentrates at a compact region adjacent to the nucleus. Because the distributions of  $APP_N$  and  $APP_C$  are largely nonoverlapping, they likely reflect the presence of the APP fragments, sAPP and CTF, respectively, rather than full-length APP. **(b)** Extensive colocalization of  $APP_N$  with Rtn4 in the soma. **(c)** Similar, reticular distribution of  $APP_N$  and Rtn4 in growth cones of extending neurites. Right images show neurite terminals. Bars = 20  $\mu$ m.

**Supplementary Figure 2.** Colocalization of APP N-terminal epitopes ( $APP_N$ ) with neurofilaments (NFs). **(a)** Dual labeling of CAD cells with antibodies to  $APP_N$  and peripherin. Note that  $APP_N$  is absent in neurite regions devoid of NFs (“so-called “gaps”). The lower images show almost perfect colocalization of  $APP_N$  with the peripherin filaments. **(b)** Knocking down peripherin expression with siRNA reduces translocation of  $APP_N$ , but not  $APP_C$  in neurites. The bottom micrographs show that RNAi significantly reduces the peripherin levels in the neurites, and at their terminals, in transfected cells (see also [8]). Transfected cells are detected by the co-expression of

GFP. Arrows point to neurites of nontransfected cells. The phase contrast micrograph shows that the neurites of transfected and nontransfected cells are of similar caliber. Bars = 20  $\mu$ m. (c) Silencing the expression of *prph* by transfection of CAD cells with peripherin siRNA diminishes the levels of peripherin protein (long arrow) by ~60% (immunoblot 2, probed with anti-peripherin antibody). The upper region of the blot was probed with an unrelated antibody, detecting two polypeptides (short arrows), to verify equal protein load (immunoblot 1). Molecular weight markers are given in kilodaltons.

# Supplementary Figure 1

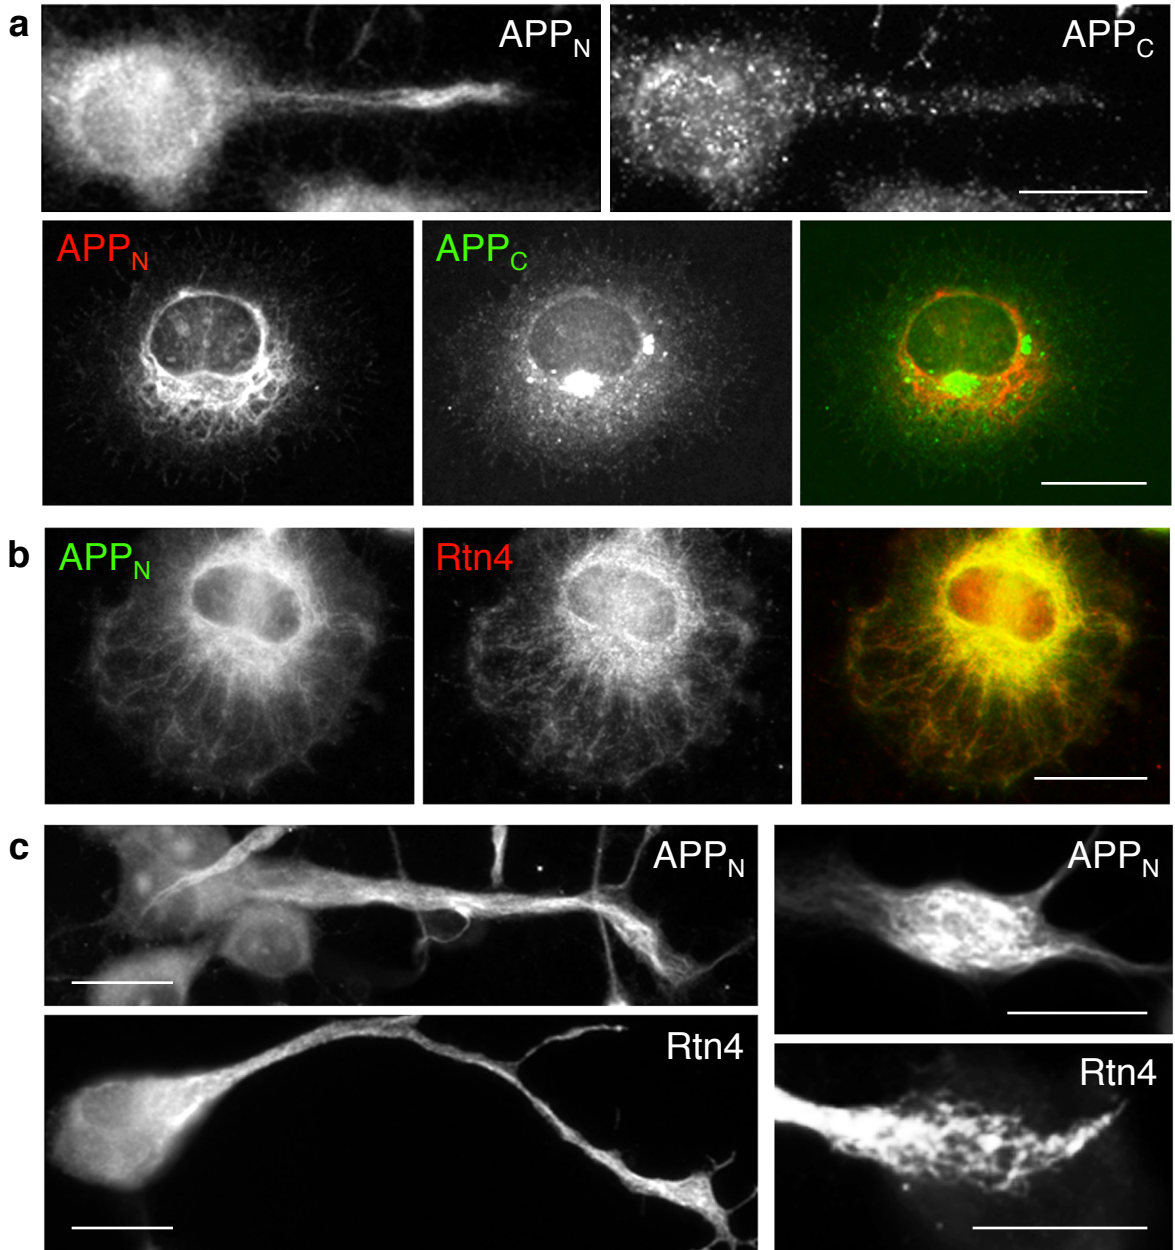

Supplement: NIHMS726179-supplement-supplement_1.pdf [file NIHMS726179-supplement-supplement_1.pdf]
